# Supplementary material for: The Perceived Likelihood of Outcome of Critical Care Patients and Its Impact on Triage Decisions: A Case-Based Survey of Intensivists and Internists in a Canadian, Quaternary Care Hospital Network
Source: PubMed Central journal article supplement (PMC4752246; doi:10.1371/journal.pone.0149196), 2016-02-12

## Supplementary material

Ethics approval:

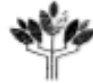

Hôpital général juif  
Jewish General Hospital

**BUREAU D'ÉTHIQUE DE LA RECHERCHE  
RESEARCH ETHICS OFFICE**

**Carolyn Ellis, Ph.D.**  
Chair, Research Ethics Committee  
Bureau / Room: A-925  
Tel: 514-340-8222 x 2445  
Fax: 514-340-7951  
Email: carolyn.ellis@mcgill.ca  
Website : jgh.ca/rec

January 10, 2012

Drs. Dev Jayaraman and Joseph Dahine  
Adult Critical Care  
Jewish General Hospital

**SUBJECT: Retrospective Chart Review CRI2-01 "Differences of perception between internists and intensivists with regards to likelihood of ICU outcome"**

Dear Drs. Jayaraman and Dahine,

Subsequent to the receipt and review of the above-mentioned project, please be advised that your request for permission to review medical charts at the Jewish General Hospital as part of your clinical research project is granted.

It is our understanding that the purpose of this chart review is to analyze the discordance in perceptions between two groups of specialists (i.e. intensivists and internists) pertaining to likelihood of ICU outcome based on multiple factors such as pre-morbid functional status, comorbidities and reason for admission. This retrospective chart review will be done by Dr. Joseph Dahine. The data collected will be anonymized and kept on Dr. Dahine's computer for one year. No contact will be made with patients at any time during this retrospective chart review.

This approval is for the period of one year at which point you must request permission once again. Please contact Ms. Louise Tanguay, Director at the Medical Records Department of the Jewish General Hospital to arrange for consulting charts. She may be contacted at (514) 340-8222, ext. 8202.

Sincerely,

Carolyn Ellis, Ph.D.  
Chair, Research Ethics Committee

Joseph Portnoy, MD  
Director of Professional Services

CEA  
CRI2-01 chart review approval

CC: Ms. Louise Tanguay, Tel: 514-340-8222, ext. 8202  
Director of Medical Records, Room C-110

Carmen Tapia - DPS A-142

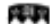

Supplement: pone.0149196.s002.pdf [file pone.0149196.s002.pdf]
